# Supplementary material for: Identification of PLCL1 Gene for Hip Bone Size Variation in Females in a Genome-Wide Association Study
Source: PLoS One. 2008 Sep 8;3(9):e3160. doi: 10.1371/journal.pone.0003160 (PMC2522269; doi:10.1371/journal.pone.0003160)
Supplement: Appendix S1 — The most significant 30 SNPs for hip BS detected in GWAS. Note: SNP A-1819962* does not have a dbSNP ID. The ID as shown in the table is an Affy ID. (0.11 MB DOC) [file pone.0003160.s001.doc]

**Appendix S1**

| Total sample | | | Female subgroup | | | Male subgroup | | |
| --- | --- | --- | --- | --- | --- | --- | --- | --- |
| dbSNP ID | p value | gene | dbSNP ID | p value | gene | dbSNP ID | p value | gene |
| rs8181826 | 1.6510-6 | C1QTNF9 | rs7595412 | 3.7210-7 | **PLCL1** | rs1075638 | 3.5110-6 | PDK1 |
| rs2466398 | 1.6610-6 | NPY | rs1286841 | 9.4510-7 | TOP2B | rs893310 | 3.5110-6 | LOC441177 |
| rs2466397 | 2.0210-6 | NPY | rs2054897 | 1.2410-6 | NGLY1 | rs3863747 | 4.8110-6 | PLD5 |
| rs2521630 | 2.0310-6 | NPY | rs6444443 | 1.3110-6 | IL1RAP | rs390423 | 5.0110-6 | FLJ32784 |
| rs2722381 | 2.3110-6 | NPY | rs6547260 | 2.5110-6 | CTNNA2 | rs12554091 | 5.8910-6 | Unknown |
| rs4789205 | 3.2210-6 | CASKIN2 | rs962207 | 3.9410-6 | SLC9A2 | rs3863745 | 6.0010-6 | PLD5 |
| rs17149209 | 3.3010-6 | NPY | A-1819962* | 4.4310-6 | LOC284402 | rs8070118 | 7.7810-6 | HS3ST3A1 |
| rs11768564 | 3.5310-6 | NPY | rs4850820 | 4.6110-6 | **PLCL1** | rs673173 | 1.4310-5 | FLJ46363 |
| rs11761673 | 3.7510-6 | NPY | rs10180112 | 4.7310-6 | **PLCL1** | rs282818 | 1.5110-5 | Unknown |
| rs8075850 | 3.9310-6 | CASKIN2 | rs714326 | 6.8810-6 | KIAA1217 | rs16846743 | 2.5110-5 | KCNH7 |
| rs2071239 | 7.1110-6 | TCOF1 | rs4850833 | 7.0410-6 | **PLCL1** | rs10878733 | 2.8210-5 | DYRK2 |
| rs12554091 | 7.9510-6 | Unknown | rs10894890 | 8.5110-6 | Unknown | rs1433930 | 2.8310-5 | PIK3C3 |
| rs3857716 | 8.5510-6 | Unknown | rs6590773 | 9.3010-6 | Unknown | rs4234723 | 2.8910-5 | JAKMIP1 |
| rs6501805 | 1.2510-5 | KIAA0195 | rs1487013 | 9.9710-6 | Unknown | rs890448 | 3.0610-5 | PPP3CA |
| rs196239 | 1.3310-5 | INPP5F | rs7136015 | 1.1010-5 | SYT1 | rs7846610 | 3.0910-5 | CLN8 |
| rs474866 | 1.3310-5 | CASP4 | rs7149043 | 1.2510-5 | GSC | rs7135745 | 3.1710-5 | FAM112B |
| rs893310 | 1.3810-5 | LOC441177 | rs7577099 | 1.2810-5 | LRRTM4 | rs7304798 | 3.1710-5 | FAM112B |
| rs11953588 | 1.4910-5 | MSX2 | rs7784081 | 1.3910-5 | OSBPL3 | rs3798867 | 3.2310-5 | SNAP91 |
| rs6461794 | 1.8110-5 | NPY | rs4907093 | 1.4210-5 | SSX2IP | rs11884875 | 3.5510-5 | KCNH7 |
| rs9384218 | 2.0510-5 | CNKSR3 | rs2428776 | 1.4410-5 | CADPS2 | rs9927029 | 3.5610-5 | ZFP1 |
| rs488137 | 2.5610-5 | HNT | rs3857116 | 1.4410-5 | Unknown | rs188848 | 3.6610-5 | DYNC1I1 |
| rs7497765 | 2.8710-5 | SLCO3A1 | rs2230906 | 1.4910-5 | GCNT2 | rs263101 | 3.6910-5 | LDLRAD3 |
| rs4832201 | 2.9610-5 | ATOH8 | rs11022298 | 1.6410-5 | MICALCL | rs6986249 | 3.9510-5 | FKSG2 |
| rs6819993 | 3.1110-5 | PRSS12 | rs17149209 | 1.6710-5 | NPY | rs10831575 | 3.9610-5 | GALNTL4 |
| rs2345408 | 3.1510-5 | FLJ36144 | rs4502543 | 1.6710-5 | Unknown | rs16892988 | 4.0510-5 | PARK2 |
| rs487303 | 3.1610-5 | HNT | rs17036521 | 1.7310-5 | Unknown | rs4369056 | 4.0710-5 | IKBKAP |
| rs1334103 | 3.2610-5 | C20orf85 | rs11768564 | 1.7710-5 | NPY | rs962115 | 4.1610-5 | IGSF11 |
| rs2054897 | 3.3310-5 | NGLY1 | rs634413 | 1.9210-5 | LOC440131 | rs12741740 | 4.2910-5 | FLJ32784 |
| rs1286841 | 3.6910-5 | TOP2B | rs11761673 | 1.9310-5 | NPY | rs1148283 | 4.3410-5 | ZNF248 |
| rs7462652 | 3.7110-5 | ZFAT1 | rs10518182 | 1.9410-5 | MRPL1 | rs7520320 | 4.3510-5 | SYT6 |
